# Supplementary material for: Saffron the “Red Gold” and Its CNS Activity: A Challenge for Future Applications in Nutraceuticals
Source: Hindawi journal article supplement (doi:10.1155/2024/6672608), 2024-03-11
Supplement: f1 [file 6672608.f1.docx]

**S1: Saffron chemical constituents: apocarotenoids, carotenoids**

The red stems of crocus are rich in apocarotenoids responsible for the color of the bitter taste, and in large part of the antioxidant activities of the spice. Apocarotenoids are formed due to enzymatic-driven oxidative cleavage of precursor carotenoids in the presence of a specific carotenoid cleavage oxygenase (CCD). The two more abundant in *C.sativus* stigmas are crocins, the glycosidic form and in a minor amount the crocetin (8,8'-Diapocarotenedioic acid) the non-glycosidic derivative. These apocarotenoids possess dicarboxylic functions that are functional to form the ester linkage with monosaccharides (mainly glucose) or the disaccharide gentibiose (Figure 1). A recent review summarises the structural peculiarities of crocins (Song et al., 2021). Crocins are a series of hydrophilic apocarotenoids, formed as monoglycosyl, diglycosyl or triglycosyl esters of crocetin. In general the most common in *C sativus* are indicated as Crocin I, II, III, IV, the first is the digentiobioside ester of all trans crocetin (alpha-crocin, crocin or crocin I), the crocin II is the gentiobioside,glucosyl ester of all trans crocetin (crocin II), gentiobioside ester of all trans crocetin is known as crocin III, and crocin IV or dicrocin is crocetin diglucosyl ester. All these compounds are mostly present in saffron in all *trans* form except some derivatives that can be found with cis configuration of the double bond C13-C12. Carotenoids, namely Zeaxanthin, Lycopene, α and β carotene, have also been identified in saffron. In addition, studies indicate that the biosynthetic pathway probably is also related to the production of violaxanthin and zeaxanthin (Dhar et al., 2017). Many research reports have reported that nearly the 94% of the total crocetin of saffron exists in glycosidic form and only the remaining 6% occurs as crocetin. Other significant compounds are the monoterpene glycoside picrocrocin (b-D-glucopyranoside of hydroxy-b-cyclocitral) and the safranal (Figure 2). The crocetindial and hydroxyl-β- cyclocitral, which is glucosylated yielding the picrocrocin (β-D gluco­pyranosidehydroxyl- β-cyclocitral). The latter, thanks to the activity of b-glu­cosidase and by dehydration (heating combined with an enzymatic action) during postharvest drying and storage stages, forms the odour-active compound safranal (Pandita, 2021).The picrocrocin is formed by the oxidative cleavage of zeaxanthin forming two molecules of picrocrocin and a crocetin. Picrocrocin is a colourless monoterpene glycoside, the second most abundant saffron phytochemical ranging from 1%–13% of saffron’s dry matter. This compound is responsible for the bitter flavor of saffron. Considering the odour-active compounds, safranal, 4-ketoisophorone, and dihydrooxophorone are the most important. (Pandita, 2021).

**S2: Saffron chemical constituents: flavonoids and other constituents**

Many other minor constituents have been described in *C.sativus* as kaempferol-7-sopho­roside and sophoraflavonoloside, phytoene, phytofluene, tetrahydrolycopene, β-carotene and zeaxanthin (Butnariu et al., 2022; Caballero-Ortega et al., 2007; Cusano et al., 2018; Midaoui et al., 2022; Pandita, 2021; Song et al., 2021). In stigmas three main flavonoid derivatives have been reported in particular kaempferol 7-O-sophoroside, kaempferol 3-O-sophoroside-7-O-glucopyranoside and kaempferol 3, 7, 4′-triglucosidem. Specifically, pyrogallol and gallic acid were isolated from the stigma. Saponins and other flavonoids have been reported in other parts of the flower (Butnariu et al., 2022; Midaoui et al., 2022; Pandita, 2021). Another review on constituents have been recently published, also discussing analytical methods, and considering all the part of crocus flower (Moratalla-López et al., 2019). Despite the large literature on saffron constituents and the large knowledge on its phytochemicals still some issue are observed relatively to the analytical approaches, identification of compounds, use of unappropiate terms to define classes of constituents of single constituents (de Castro & Quiles-Zafra, 2020; Tsimidou, 2023). More attention should be payed to starting materials, sample pretreatment, and to the different possible formulations because all these procedures may affect the stability and the release of bioactive constituents when administered(de Castro & Quiles-Zafra, 2020; Garavand et al., 2019; Tsimidou, 2023).

Figure S1: main-coloured compounds in Saffron

Figure S2: structures of picrocrocin and its degradation product safranal
